# Supplementary figures and images for: Bond breaking dynamics in semiflexible networks under load
Source: Royal Society of Chemistry journal article supplement (doi:10.1039/c5sm00262a), 2015-01-01

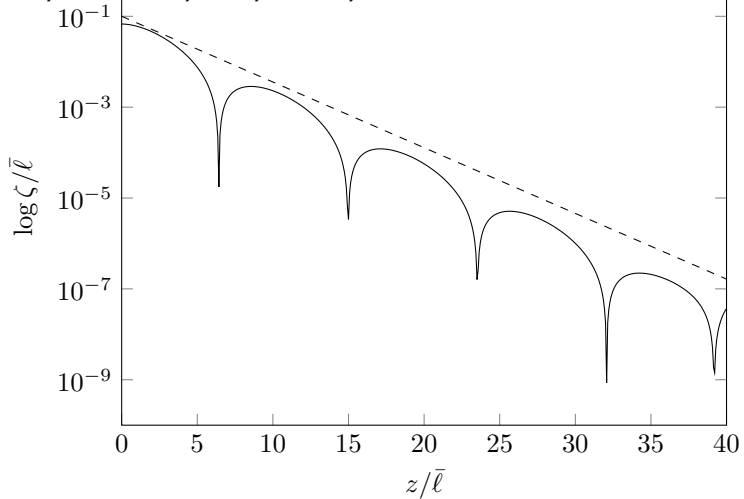

Supplement: c5sm00262a3.pdf [file c5sm00262a3.pdf]
